# Supplementary material for: The neural basis of tadpole transport in poison frogs
Source: bioRxiv or medRxiv preprint supplement (doi:10.1101/630681), 2019-06-17
Supplement: Supplementary file [file media-1.pdf]

**NEUROANATOMICAL ATLAS OF THE DYEING POISON FROG  
(*Dendrobates tinctorius*)**

Lauren A O'Connell

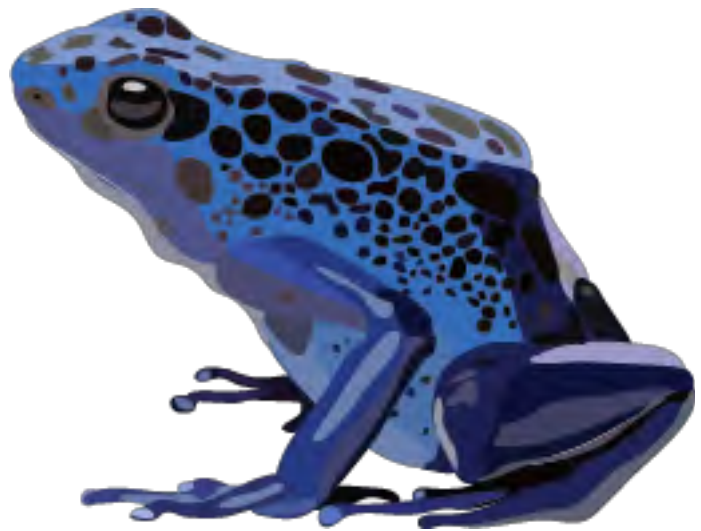

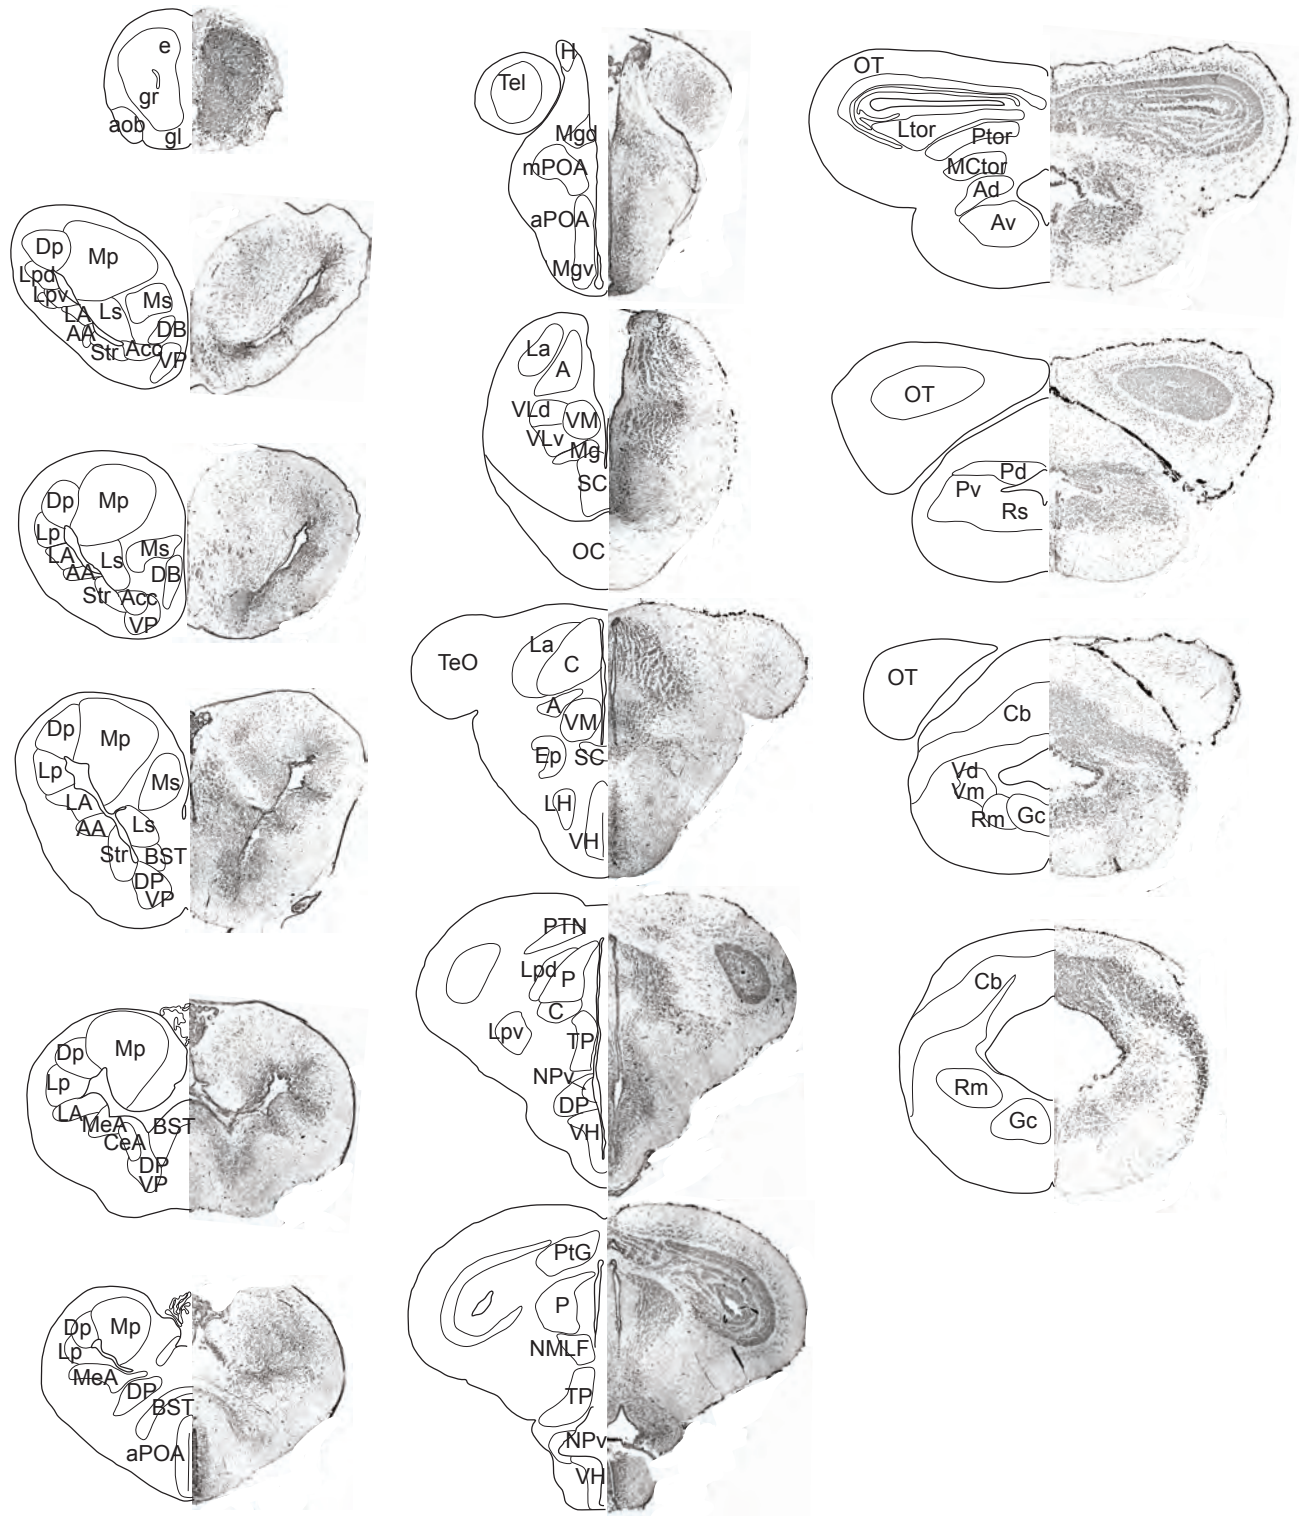

## List of Abbreviations

|       |                                              |
|-------|----------------------------------------------|
| A     | anterior thalamic nucleus                    |
| AA    | anterior amygdaloid area                     |
| Acc   | nucleus accumbens                            |
| Ad    | anterodorsal tegmental nucleus               |
| AH    | anterior hypothalamus                        |
| aob   | accessory olfactory bulb                     |
| Av    | anteroventral tegmental nucleus              |
| BST   | bed nucleus of the stria terminalis          |
| C     | central thalamic nucleus                     |
| Cb    | Cerebellum                                   |
| CeA   | central amygdala                             |
| DB    | diagonal band of Broca                       |
| DH    | dorsal hypothalamic nucleus                  |
| Dp    | dorsal pallium                               |
| DP    | dorsal pallidum                              |
| e     | postolfactory eminence                       |
| Ep    | posterior entopeduncular nucleus             |
| Gc    | griseum centrale rhombencephali              |
| gl    | glomerular layer of the olfactory bulb       |
| gr    | granule cell layer of the olfactory bulb     |
| Hv    | ventral habenula                             |
| La    | lateral thalamic nucleus, anterior division  |
| LA    | lateral amygdale                             |
| LH    | lateral hypothalamic nucleus                 |
| Lp    | lateral pallium                              |
| Lpd   | lateral thalamic nucleus, posterodorsale     |
| Lpv   | lateral thalamic nucleus, posteroventrale    |
| Ls    | lateral septum                               |
| M     | dorsal midline                               |
| MeA   | medial amygdale                              |
| Mgd   | magnocellular preoptic nucleus, dorsal part  |
| Mgv   | magnocellular preoptic nucleus, ventral part |
| ml    | mitral cell layer of the olfactory bulb      |
| Mp    | medial pallium                               |
| Ms    | medial septum                                |
| ON    | optic nerve                                  |
| Npv   | nucleus of the periventricular organ         |
| P     | posterior thalamic nucleus                   |
| Pd    | nucleus posterodorsalis tegmenti             |
| aPOA  | anterior preoptic area                       |
| mPOA  | medial preoptic area                         |
| Pv    | nucleus posteroventralis tegmenti            |
| Rm    | nucleus reticularis medius                   |
| Rs    | nucleus reticularis superior                 |
| SC    | suprachiasmatic nucleus                      |
| Str   | Striatum                                     |
| Tect  | optic tectum                                 |
| Tel   | telencephalon                                |
| Tor-L | torus semicircularis, laminar nucleus        |
| Tor-P | torus semicircularis, principal nucleus      |
| Tor-V | torus semicircularis, ventral area           |
| TP    | posterior tuberculum                         |
| Vd    | descending trigeminal tract                  |
| VH    | ventral hypothalamic nucleus                 |
| VLd   | ventrolateral thalamic nucleus, dorsal part  |
| VLv   | ventrolateral thalamic nucleus, ventral part |
| Vm    | nucleus motorius nervi trigemini             |
| VM    | ventromedial thalamic nucleus                |
| VP    | ventral pallidum                             |
